# Supplementary material for: Application of a New Multiplexed Array for Rapid, Sensitive, Simultaneous and Quantitative Assessment of Spliced and Unspliced XBP1
Source: PubMed Central journal article supplement (PMC6857227; doi:10.1186/s12575-019-0111-3), 2019-11-15

**A**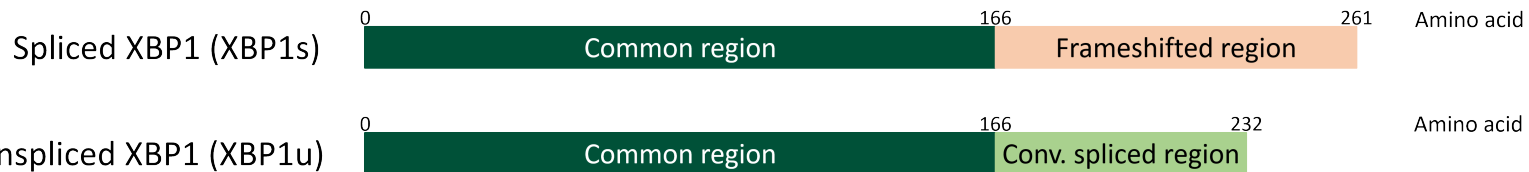**B**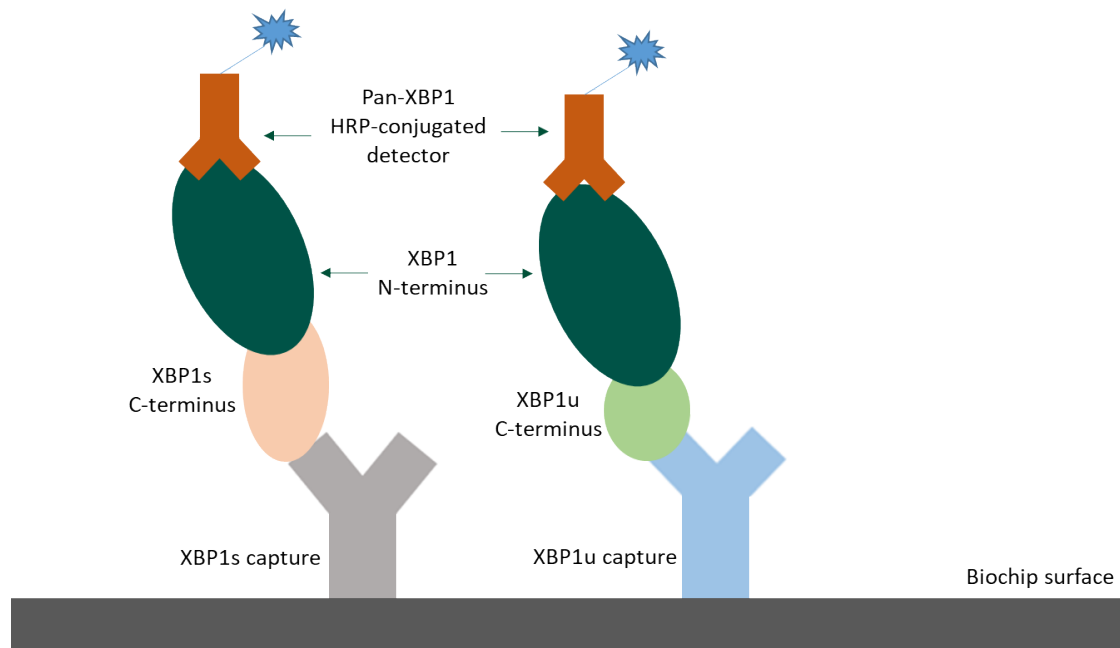

Supplement: 12575_2019_111_MOESM1_ESM.pdf [file 12575_2019_111_MOESM1_ESM.pdf]
