# Supplementary material for: Application of a New Multiplexed Array for Rapid, Sensitive, Simultaneous and Quantitative Assessment of Spliced and Unspliced XBP1
Source: PubMed Central journal article supplement (PMC6857227; doi:10.1186/s12575-019-0111-3), 2019-11-15
Supplement: 12575_2019_111_MOESM2_ESM.pdf [file 12575_2019_111_MOESM2_ESM.pdf]

**A**

| [XBP1u] (ng) | DTR 8 (XBP1s) | DTR 14 (XBP1u) |
|--------------|---------------|----------------|
| 0.000        | <b>38</b>     | 59             |
| 0.020        | <b>44</b>     | 286            |
| 0.039        | <b>64</b>     | 485            |
| 0.078        | <b>45</b>     | 958            |
| 0.156        | <b>54</b>     | 1944           |
| 0.312        | <b>52</b>     | 4033           |
| 0.625        | <b>39</b>     | 8602           |
| 1.250        | <b>64</b>     | 16254          |
| 2.500        | <b>91</b>     | 33136          |

**B**

| [XBP1s] (ng) | DTR 8 (XBP1s) | DTR 14 (XBP1u) |
|--------------|---------------|----------------|
| 0.000        | 64            | <b>97</b>      |
| 0.020        | 620           | <b>68</b>      |
| 0.039        | 1200          | <b>86</b>      |
| 0.078        | 2466          | <b>66</b>      |
| 0.156        | 4876          | <b>85</b>      |
| 0.312        | 10779         | <b>73</b>      |
| 0.625        | 27219         | <b>100</b>     |
| 1.250        | 48714         | <b>81</b>      |
| 2.500        | 100067        | <b>92</b>      |
